# Supplementary material
Source: PubMed Central journal article supplement (PMC4960364)
Supplement: brc-0011-0183-s01.pdf [file brc-0011-0183-s01.pdf]

**Supplemental Material**

| Screening-step                                                                                                                                                                                                                                                                                                                                                                                                   | Person                                                                                                                                                                                                                                                                                                                                                                                                                | Location                                                                                                                                                                                                   |
|------------------------------------------------------------------------------------------------------------------------------------------------------------------------------------------------------------------------------------------------------------------------------------------------------------------------------------------------------------------------------------------------------------------|-----------------------------------------------------------------------------------------------------------------------------------------------------------------------------------------------------------------------------------------------------------------------------------------------------------------------------------------------------------------------------------------------------------------------|------------------------------------------------------------------------------------------------------------------------------------------------------------------------------------------------------------|
| <p><b>written invitation</b><br/>with appointment time and place, every 24 months</p> <p>if woman participates</p>                                                                                                                                                                                                                                                                                               | invitation center personnel                                                                                                                                                                                                                                                                                                                                                                                           | <p><b>invitation center</b><br/>established exclusively for organizing the screening invitations, address data is provided by population registries</p>                                                    |
| <p><b>anamnesis and mammography</b><br/>documentation of relevant medical history, two view mammograms (cc &amp; mlo)</p> <p><b>double reading</b><br/>independent, separated by time or place</p> <p>if at least one reader recommends consensus meeting</p>                                                                                                                                                    | <p><b>radiographer</b><br/>licensed for taking screening mammograms</p> <p><b>radiologist or gynecologist</b><br/>licensed for reading screening mammograms</p>                                                                                                                                                                                                                                                       | <p><b>mammography unit</b><br/>established exclusively for taking screening mammograms, some of them mobile</p> <p>usually at the doctor's office of reading radiologist or gynecologist</p>               |
| <p><b>consensus meeting</b><br/>consensus reading, final judgment by responsible practitioner</p> <p>if consensus meeting recommends assessment (mammographic, clinical or technical recall)</p>                                                                                                                                                                                                                 | <b>responsible practitioner &amp; radiologist or gynecologist</b>                                                                                                                                                                                                                                                                                                                                                     | at doctor's office or assessment center, depending on the organization of the screening unit                                                                                                               |
| <p><b>Non-invasive assessment</b><br/>clinical assessment, ultrasound, additional mammograms, in rare cases MRT</p> <p>if non-invasive assessment cannot rule out malignancy</p>                                                                                                                                                                                                                                 | <b>responsible practitioner</b><br>licensed for providing screening service within a screening unit                                                                                                                                                                                                                                                                                                                   | <b>assessment unit</b><br>during assessment exclusively for screening patients                                                                                                                             |
| <p><b>minimal-invasive assessment</b><br/>ultrasound or mammography guided core or vacuum biopsy</p> <p><b>histological assessment</b></p> <p><b>interdisciplinary consensus meeting</b><br/>case discussion with final diagnosis or recommendation of further assessment and quality control of diagnostic chain</p> <p>if malignant finding is confirmed in consensus meeting and treatment is recommended</p> | <p><b>responsible practitioner or radiologist</b> licensed for mammography guided core or vacuum biopsy within the screening program</p> <p><b>pathologist</b><br/>licensed for histological assessment within the screening program</p> <p><b>responsible practitioner &amp; pathologist</b><br/>recommended but optional participants: radiologist or gynecologist, surgeon, physicians from breast care center</p> | <p><b>assessment unit</b> or breast care center</p> <p>pathological institute</p> <p>at doctor's office, assessment center, or breast care center, depending on the organization of the screening unit</p> |
| <p><b>treatment</b><br/>surgery and therapy</p> <p>if surgical or pathological documentation is available</p>                                                                                                                                                                                                                                                                                                    |                                                                                                                                                                                                                                                                                                                                                                                                                       | breast care center<br>not part of the screening program                                                                                                                                                    |
| <p><b>interdisciplinary consensus meeting</b><br/>tumor documentation and quality control of diagnostic chain</p>                                                                                                                                                                                                                                                                                                | <b>responsible practitioner &amp; pathologist</b><br>recommended but optional participants: radiologist or gynecologist, surgeon, physicians from breast care center                                                                                                                                                                                                                                                  | at doctor's office, assessment center, or breast care center, depending on the organization of the screening unit                                                                                          |

Fig. 1: Flowchart of the screening chain with responsibilities (person and location)

Dr. Daniela Malek  
Kooperationsgemeinschaft Mammographie  
Goethestrasse 85  
10623 Berlin, Germany  
dmalek@koop-mammo.de
